# Supplementary material
Source: Research Square preprint supplement (doi:10.21203/rs.3.rs-9719137/v1)
Supplement: Supplementary file 1 [file 08acc724f2ed954fa85a8d25.docx]

**Appendix A:**

**Nomenclature and Symbols**

| AdaBoost | Adaptive Boosting |
| --- | --- |
| ANFIS | Adaptive Neuro-Fuzzy Inference System |
| ANN | Artificial Neural Networks |
| DT | Decision Tree |
| MAE | Mean Absolute Error |
| MLP | Multilayer Perceptron |
| N | Number of Data Points |
| RMSE | Root Mean Square Error |
| SHAP | Shapley Additive Explanations |
| SVR | Support Vector Regression |
| SVM | Support Vector Machine |
| XGBoost | Extreme Gradient Boosting |
| R2 | Coefficient of Determination |
| RF | Random Forest |
|  | Actual Ultimate Recovery Factor |
|  | Model-Predicted Ultimate Recovery Value |
|  | Mean Ultimate Recovery Factor Value |
