# Supplementary material
Source: Research Square preprint supplement (doi:10.21203/rs.3.rs-9719137/v1)
Supplement: Supplementary file 2 [file 5cfc2c13a2f2b3a9a7a26316.xlsx]

## Sheet: Sheet1
Reference in Manuscript	DOI	Material	Medium or Solution	Inhibitor Concentration (g)	Temperature (degK)	Exposure Time (hour)	Weight Loss (mg)	Corrosion Rate (mmpy)	Inhibition Efficiency (%)
52	https://doi.org/10.1016/j.dib.2018.11.134	stainless steel Type 316	0.5M H2SO4	0	298	24	-	1.78665	0
52	https://doi.org/10.1016/j.dib.2018.11.134	stainless steel Type 316	0.5M H2SO4	2	298	24	-	2.20805	72.053
52	https://doi.org/10.1016/j.dib.2018.11.134	stainless steel Type 316	0.5M H2SO4	4	298	24	-	2.50055	84.2384
52	https://doi.org/10.1016/j.dib.2018.11.134	stainless steel Type 316	0.5M H2SO4	6	298	24	-	2.73356	87.947
52	https://doi.org/10.1016/j.dib.2018.11.134	stainless steel Type 316	0.5M H2SO4	8	298	24	-	2.94178	91.5232
52	https://doi.org/10.1016/j.dib.2018.11.134	stainless steel Type 316	0.5M H2SO4	10	298	24	-	3.15496	94.8344
52	https://doi.org/10.1016/j.dib.2018.11.134	stainless steel Type 316	0.5M H2SO4	0	298	48	6.56522	0.988475	0
52	https://doi.org/10.1016/j.dib.2018.11.134	stainless steel Type 316	0.5M H2SO4	2	298	48	13.4	2.02958	67.6821
52	https://doi.org/10.1016/j.dib.2018.11.134	stainless steel Type 316	0.5M H2SO4	4	298	48	17.9391	2.41131	81.5894
52	https://doi.org/10.1016/j.dib.2018.11.134	stainless steel Type 316	0.5M H2SO4	6	298	48	22.6348	2.64432	84.7682
52	https://doi.org/10.1016/j.dib.2018.11.134	stainless steel Type 316	0.5M H2SO4	8	298	48	27.0696	2.8575	89.2715
52	https://doi.org/10.1016/j.dib.2018.11.134	stainless steel Type 316	0.5M H2SO4	10	298	48	31.5043	3.14008	92.4503
52	https://doi.org/10.1016/j.dib.2018.11.134	stainless steel Type 316	0.5M H2SO4	0	298	72	7.71304	0.775297	0
52	https://doi.org/10.1016/j.dib.2018.11.134	stainless steel Type 316	0.5M H2SO4	2	298	72	13.6087	1.97008	64.9007
52	https://doi.org/10.1016/j.dib.2018.11.134	stainless steel Type 316	0.5M H2SO4	4	298	72	18.3043	2.37165	80.5298
52	https://doi.org/10.1016/j.dib.2018.11.134	stainless steel Type 316	0.5M H2SO4	6	298	72	22.7913	2.62945	83.1788
52	https://doi.org/10.1016/j.dib.2018.11.134	stainless steel Type 316	0.5M H2SO4	8	298	72	27.3826	2.86742	86.8874
52	https://doi.org/10.1016/j.dib.2018.11.134	stainless steel Type 316	0.5M H2SO4	10	298	72	31.8174	3.14008	89.6689
52	https://doi.org/10.1016/j.dib.2018.11.134	stainless steel Type 316	0.5M H2SO4	0	298	96	7.92174	0.562119	0
52	https://doi.org/10.1016/j.dib.2018.11.134	stainless steel Type 316	0.5M H2SO4	2	298	96	14.2348	1.95521	58.2781
52	https://doi.org/10.1016/j.dib.2018.11.134	stainless steel Type 316	0.5M H2SO4	4	298	96	19.3478	2.42619	68.4768
52	https://doi.org/10.1016/j.dib.2018.11.134	stainless steel Type 316	0.5M H2SO4	6	298	96	23.7304	2.66911	72.053
52	https://doi.org/10.1016/j.dib.2018.11.134	stainless steel Type 316	0.5M H2SO4	8	298	96	27.9565	2.89716	78.543
52	https://doi.org/10.1016/j.dib.2018.11.134	stainless steel Type 316	0.5M H2SO4	10	298	96	31.7652	3.13017	88.7417
52	https://doi.org/10.1016/j.dib.2018.11.134	stainless steel Type 316	0.5M H2SO4	0	298	120	8.70435	0.487754	0
52	https://doi.org/10.1016/j.dib.2018.11.134	stainless steel Type 316	0.5M H2SO4	2	298	120	14.8609	1.93042	56.2914
52	https://doi.org/10.1016/j.dib.2018.11.134	stainless steel Type 316	0.5M H2SO4	4	298	120	19.713	2.39148	67.8146
52	https://doi.org/10.1016/j.dib.2018.11.134	stainless steel Type 316	0.5M H2SO4	6	298	120	24.2	2.65424	70.1987
52	https://doi.org/10.1016/j.dib.2018.11.134	stainless steel Type 316	0.5M H2SO4	8	298	120	28.4261	2.88725	76.9536
52	https://doi.org/10.1016/j.dib.2018.11.134	stainless steel Type 316	0.5M H2SO4	10	298	120	31.9739	3.12025	88.6093
52	https://doi.org/10.1016/j.dib.2018.11.134	stainless steel Type 316	0.5M H2SO4	0	298	144	8.96522	0.403475	0
52	https://doi.org/10.1016/j.dib.2018.11.134	stainless steel Type 316	0.5M H2SO4	2	298	144	15.5913	1.9453	47.2848
52	https://doi.org/10.1016/j.dib.2018.11.134	stainless steel Type 316	0.5M H2SO4	4	298	144	20.1304	2.40636	62.9139
52	https://doi.org/10.1016/j.dib.2018.11.134	stainless steel Type 316	0.5M H2SO4	6	298	144	24.3565	2.64432	67.5497
52	https://doi.org/10.1016/j.dib.2018.11.134	stainless steel Type 316	0.5M H2SO4	8	298	144	28.5826	2.8922	73.1126
52	https://doi.org/10.1016/j.dib.2018.11.134	stainless steel Type 316	0.5M H2SO4	10	298	144	31.9739	3.11034	87.6821
52	https://doi.org/10.1016/j.dib.2018.11.134	stainless steel Type 316	0.5M H2SO4	0	298	168	9.8	0.383644	0
52	https://doi.org/10.1016/j.dib.2018.11.134	stainless steel Type 316	0.5M H2SO4	2	298	168	16.4783	1.9453	43.9735
52	https://doi.org/10.1016/j.dib.2018.11.134	stainless steel Type 316	0.5M H2SO4	4	298	168	21.6957	2.42619	50.9934
52	https://doi.org/10.1016/j.dib.2018.11.134	stainless steel Type 316	0.5M H2SO4	6	298	168	26.0261	2.70877	53.1126
52	https://doi.org/10.1016/j.dib.2018.11.134	stainless steel Type 316	0.5M H2SO4	8	298	168	30.4087	2.94674	57.0861
52	https://doi.org/10.1016/j.dib.2018.11.134	stainless steel Type 316	0.5M H2SO4	10	298	168	32.1304	3.12025	86.8874
52	https://doi.org/10.1016/j.dib.2018.11.134	stainless steel Type 316	0.5M H2SO4	0	298	192	12.2	0.41339	0
52	https://doi.org/10.1016/j.dib.2018.11.134	stainless steel Type 316	0.5M H2SO4	2	298	192	17	1.93042	-
52	https://doi.org/10.1016/j.dib.2018.11.134	stainless steel Type 316	0.5M H2SO4	4	298	192	21.5913	2.39644	-
52	https://doi.org/10.1016/j.dib.2018.11.134	stainless steel Type 316	0.5M H2SO4	6	298	192	26.1826	2.66911	-
52	https://doi.org/10.1016/j.dib.2018.11.134	stainless steel Type 316	0.5M H2SO4	8	298	192	30.2522	2.91699	-
52	https://doi.org/10.1016/j.dib.2018.11.134	stainless steel Type 316	0.5M H2SO4	10	298	192	32.0783	3.10042	-
53	https://doi.org/10.15282/jmes.18.3.2024.8.0805	AISI 1020 steel	1M HCl	0	298	168	-	0.27611	0
53	https://doi.org/10.15282/jmes.18.3.2024.8.0805	AISI 1020 steel	1M HCl	8	298	168	-	0.07705	72.09
53	https://doi.org/10.15282/jmes.18.3.2024.8.0805	AISI 1020 steel	1M HCl	16	298	168	-	0.05522	80
53	https://doi.org/10.15282/jmes.18.3.2024.8.0805	AISI 1020 steel	1M HCl	24	298	168	-	0.03211	88.37
53	https://doi.org/10.15282/jmes.18.3.2024.8.0805	AISI 1020 steel	1M HCl	0	298	336	-	0.37885	0
53	https://doi.org/10.15282/jmes.18.3.2024.8.0805	AISI 1020 steel	1M HCl	8	298	336	-	0.15128	60.07
53	https://doi.org/10.15282/jmes.18.3.2024.8.0805	AISI 1020 steel	1M HCl	16	298	336	-	0.09795	74.14
53	https://doi.org/10.15282/jmes.18.3.2024.8.0805	AISI 1020 steel	1M HCl	24	298	336	-	0.07834	79.32
53	https://doi.org/10.15282/jmes.18.3.2024.8.0805	AISI 1020 steel	1M HCl	0	298	504	-	0.41123	0
53	https://doi.org/10.15282/jmes.18.3.2024.8.0805	AISI 1020 steel	1M HCl	8	298	504	-	0.16985	58.7
53	https://doi.org/10.15282/jmes.18.3.2024.8.0805	AISI 1020 steel	1M HCl	16	298	504	-	0.11352	72.39
53	https://doi.org/10.15282/jmes.18.3.2024.8.0805	AISI 1020 steel	1M HCl	24	298	504	-	0.09175	77.67
54	DOI 10.7449/2018/MST_2018_254_261	Aluminium alloy	0.5M H2SO4	0	298	24	17.6157	3.72437	0
54	DOI 10.7449/2018/MST_2018_254_261	Aluminium alloy	0.5M H2SO4	2	298	24	2.02847	0.457143	87.2651
54	DOI 10.7449/2018/MST_2018_254_261	Aluminium alloy	0.5M H2SO4	4	298	24	0.960856	0.147899	94.9896
54	DOI 10.7449/2018/MST_2018_254_261	Aluminium alloy	0.5M H2SO4	6	298	24	0.427048	0.147899	95.8246
54	DOI 10.7449/2018/MST_2018_254_261	Aluminium alloy	0.5M H2SO4	8	298	24	0.10676	0.0672269	97.7036
54	DOI 10.7449/2018/MST_2018_254_261	Aluminium alloy	0.5M H2SO4	10	298	24	0.10676	0.0672269	97.9123
54	DOI 10.7449/2018/MST_2018_254_261	Aluminium alloy	0.5M H2SO4	0	298	48	30.9609	3.2605	0
54	DOI 10.7449/2018/MST_2018_254_261	Aluminium alloy	0.5M H2SO4	2	298	48	6.08541	0.645378	79.9582
54	DOI 10.7449/2018/MST_2018_254_261	Aluminium alloy	0.5M H2SO4	4	298	48	2.02847	0.208403	92.2756
54	DOI 10.7449/2018/MST_2018_254_261	Aluminium alloy	0.5M H2SO4	6	298	48	2.02847	0.208403	93.3194
54	DOI 10.7449/2018/MST_2018_254_261	Aluminium alloy	0.5M H2SO4	8	298	48	0.213528	0.040336	98.1211
54	DOI 10.7449/2018/MST_2018_254_261	Aluminium alloy	0.5M H2SO4	10	298	48	0.320288	0.040336	97.9123
54	DOI 10.7449/2018/MST_2018_254_261	Aluminium alloy	0.5M H2SO4	0	298	72	36.0854	2.54118	0
54	DOI 10.7449/2018/MST_2018_254_261	Aluminium alloy	0.5M H2SO4	2	298	72	8.86121	0.62521	74.739
54	DOI 10.7449/2018/MST_2018_254_261	Aluminium alloy	0.5M H2SO4	4	298	72	8.43417	0.605042	75.5741
54	DOI 10.7449/2018/MST_2018_254_261	Aluminium alloy	0.5M H2SO4	6	298	72	8.43417	0.605042	76.4092
54	DOI 10.7449/2018/MST_2018_254_261	Aluminium alloy	0.5M H2SO4	8	298	72	1.28114	0.107563	95.6159
54	DOI 10.7449/2018/MST_2018_254_261	Aluminium alloy	0.5M H2SO4	10	298	72	1.3879	0.10084	95.8246
54	DOI 10.7449/2018/MST_2018_254_261	Aluminium alloy	0.5M H2SO4	0	298	96	37.153	1.96303	0
54	DOI 10.7449/2018/MST_2018_254_261	Aluminium alloy	0.5M H2SO4	2	298	96	9.7153	0.510924	73.6952
54	DOI 10.7449/2018/MST_2018_254_261	Aluminium alloy	0.5M H2SO4	4	298	96	9.28826	0.484033	73.6952
54	DOI 10.7449/2018/MST_2018_254_261	Aluminium alloy	0.5M H2SO4	6	298	96	9.39502	0.484033	74.5303
54	DOI 10.7449/2018/MST_2018_254_261	Aluminium alloy	0.5M H2SO4	8	298	96	1.60142	0.0739495	95.1983
54	DOI 10.7449/2018/MST_2018_254_261	Aluminium alloy	0.5M H2SO4	10	298	96	1.60142	0.0739495	95.6159
54	DOI 10.7449/2018/MST_2018_254_261	Aluminium alloy	0.5M H2SO4	0	298	120	49.7509	2.09076	0
54	DOI 10.7449/2018/MST_2018_254_261	Aluminium alloy	0.5M H2SO4	2	298	120	12.9181	0.557983	72.6514
54	DOI 10.7449/2018/MST_2018_254_261	Aluminium alloy	0.5M H2SO4	4	298	120	12.9181	0.557983	73.4864
54	DOI 10.7449/2018/MST_2018_254_261	Aluminium alloy	0.5M H2SO4	6	298	120	11.8505	0.490756	75.9917
54	DOI 10.7449/2018/MST_2018_254_261	Aluminium alloy	0.5M H2SO4	8	298	120	2.34876	0.0941172	94.572
54	DOI 10.7449/2018/MST_2018_254_261	Aluminium alloy	0.5M H2SO4	10	298	120	2.34876	0.0941172	94.9896
54	DOI 10.7449/2018/MST_2018_254_261	Aluminium alloy	0.5M H2SO4	0	298	144	56.0498	1.97647	0
54	DOI 10.7449/2018/MST_2018_254_261	Aluminium alloy	0.5M H2SO4	2	298	144	19.9644	0.692437	64.0919
54	DOI 10.7449/2018/MST_2018_254_261	Aluminium alloy	0.5M H2SO4	4	298	144	14.0925	0.497479	73.4864
54	DOI 10.7449/2018/MST_2018_254_261	Aluminium alloy	0.5M H2SO4	6	298	144	14.1993	0.497479	74.3215
54	DOI 10.7449/2018/MST_2018_254_261	Aluminium alloy	0.5M H2SO4	8	298	144	2.45552	0.0941172	94.572
54	DOI 10.7449/2018/MST_2018_254_261	Aluminium alloy	0.5M H2SO4	10	298	144	2.34876	0.0941172	94.9896
54	DOI 10.7449/2018/MST_2018_254_261	Aluminium alloy	0.5M H2SO4	0	298	168	58.3986	1.74118	0
54	DOI 10.7449/2018/MST_2018_254_261	Aluminium alloy	0.5M H2SO4	2	298	168	21.6726	0.652101	62.4217
54	DOI 10.7449/2018/MST_2018_254_261	Aluminium alloy	0.5M H2SO4	4	298	168	15.694	0.470588	71.6075
54	DOI 10.7449/2018/MST_2018_254_261	Aluminium alloy	0.5M H2SO4	6	298	168	15.694	0.470588	72.4426
54	DOI 10.7449/2018/MST_2018_254_261	Aluminium alloy	0.5M H2SO4	8	298	168	2.56228	0.0806721	94.3633
54	DOI 10.7449/2018/MST_2018_254_261	Aluminium alloy	0.5M H2SO4	10	298	168	2.56228	0.0806721	94.9896
55	https://doi.org/10.1016/j.egypro.2018.11.227	stainless steel Type 904	0.5M H2SO4	0	298	0	1.68906	0.148368	0
55	https://doi.org/10.1016/j.egypro.2018.11.227	stainless steel Type 904	0.5M H2SO4	2	298	0	0.767754	0.0926116	38.0165
55	https://doi.org/10.1016/j.egypro.2018.11.227	stainless steel Type 904	0.5M H2SO4	4	298	0	0.460651	0.057646	61.157
55	https://doi.org/10.1016/j.egypro.2018.11.227	stainless steel Type 904	0.5M H2SO4	6	298	0	0.383877	0.0008185	99.5868
55	https://doi.org/10.1016/j.egypro.2018.11.227	stainless steel Type 904	0.5M H2SO4	8	298	0	0.383877	0.0008185	99.5868
55	https://doi.org/10.1016/j.egypro.2018.11.227	stainless steel Type 904	0.5M H2SO4	10	298	0	0.383877	0.0008185	99.5868
55	https://doi.org/10.1016/j.egypro.2018.11.227	stainless steel Type 904	0.5M H2SO4	0	298	24	2.91747	0.164433	0
55	https://doi.org/10.1016/j.egypro.2018.11.227	stainless steel Type 904	0.5M H2SO4	2	298	24	1.45873	0.0727663	54.7521
55	https://doi.org/10.1016/j.egypro.2018.11.227	stainless steel Type 904	0.5M H2SO4	4	298	24	0.767754	0.0292955	82.438
55	https://doi.org/10.1016/j.egypro.2018.11.227	stainless steel Type 904	0.5M H2SO4	6	298	24	0.767754	0.0170103	89.0496
55	https://doi.org/10.1016/j.egypro.2018.11.227	stainless steel Type 904	0.5M H2SO4	8	298	24	0.230329	0.000945003	99.3802
55	https://doi.org/10.1016/j.egypro.2018.11.227	stainless steel Type 904	0.5M H2SO4	10	298	24	0.230329	0.000945003	99.5868
55	https://doi.org/10.1016/j.egypro.2018.11.227	stainless steel Type 904	0.5M H2SO4	0	298	48	4.14587	0.155928	0
55	https://doi.org/10.1016/j.egypro.2018.11.227	stainless steel Type 904	0.5M H2SO4	2	298	48	1.76584	0.0765464	50.8264
55	https://doi.org/10.1016/j.egypro.2018.11.227	stainless steel Type 904	0.5M H2SO4	4	298	48	1.84261	0.0642611	58.0579
55	https://doi.org/10.1016/j.egypro.2018.11.227	stainless steel Type 904	0.5M H2SO4	6	298	48	1.22841	0.0378007	75.2066
55	https://doi.org/10.1016/j.egypro.2018.11.227	stainless steel Type 904	0.5M H2SO4	8	298	48	0.230329	0.00283501	99.5868
55	https://doi.org/10.1016/j.egypro.2018.11.227	stainless steel Type 904	0.5M H2SO4	10	298	48	0.230329	0.00283501	99.5868
55	https://doi.org/10.1016/j.egypro.2018.11.227	stainless steel Type 904	0.5M H2SO4	0	298	72	14.2035	0.399742	0
55	https://doi.org/10.1016/j.egypro.2018.11.227	stainless steel Type 904	0.5M H2SO4	2	298	72	7.44721	0.209794	47.1074
55	https://doi.org/10.1016/j.egypro.2018.11.227	stainless steel Type 904	0.5M H2SO4	4	298	72	6.21881	0.177663	55.5785
55	https://doi.org/10.1016/j.egypro.2018.11.227	stainless steel Type 904	0.5M H2SO4	6	298	72	3.60844	0.102062	74.1736
55	https://doi.org/10.1016/j.egypro.2018.11.227	stainless steel Type 904	0.5M H2SO4	8	298	72	0.307103	0.00283501	99.5868
55	https://doi.org/10.1016/j.egypro.2018.11.227	stainless steel Type 904	0.5M H2SO4	10	298	72	0.230329	0.00283501	99.5868
55	https://doi.org/10.1016/j.egypro.2018.11.227	stainless steel Type 904	0.5M H2SO4	0	298	96	14.5106	0.328866	0
55	https://doi.org/10.1016/j.egypro.2018.11.227	stainless steel Type 904	0.5M H2SO4	2	298	96	8.59884	0.193728	40.9091
55	https://doi.org/10.1016/j.egypro.2018.11.227	stainless steel Type 904	0.5M H2SO4	4	298	96	6.37236	0.144588	55.9917
55	https://doi.org/10.1016/j.egypro.2018.11.227	stainless steel Type 904	0.5M H2SO4	6	298	96	3.99232	0.0878866	72.7273
55	https://doi.org/10.1016/j.egypro.2018.11.227	stainless steel Type 904	0.5M H2SO4	8	298	96	0.230329	0.000945003	99.5868
55	https://doi.org/10.1016/j.egypro.2018.11.227	stainless steel Type 904	0.5M H2SO4	10	298	96	0.230329	0.000945003	99.5868
55	https://doi.org/10.1016/j.egypro.2018.11.227	stainless steel Type 904	0.5M H2SO4	0	298	120	15.6622	0.29579	0
55	https://doi.org/10.1016/j.egypro.2018.11.227	stainless steel Type 904	0.5M H2SO4	2	298	120	9.52015	0.179553	39.4628
55	https://doi.org/10.1016/j.egypro.2018.11.227	stainless steel Type 904	0.5M H2SO4	4	298	120	7.29367	0.138918	53.3058
55	https://doi.org/10.1016/j.egypro.2018.11.227	stainless steel Type 904	0.5M H2SO4	6	298	120	4.29942	0.0793814	72.7273
55	https://doi.org/10.1016/j.egypro.2018.11.227	stainless steel Type 904	0.5M H2SO4	8	298	120	0.0767743	0.000945003	99.5868
55	https://doi.org/10.1016/j.egypro.2018.11.227	stainless steel Type 904	0.5M H2SO4	10	298	120	0.0767743	0.000945003	99.5868
55	https://doi.org/10.1016/j.egypro.2018.11.227	stainless steel Type 904	0.5M H2SO4	0	298	144	26.4107	0.429038	0
55	https://doi.org/10.1016/j.egypro.2018.11.227	stainless steel Type 904	0.5M H2SO4	2	298	144	16.1996	0.260825	39.0496
55	https://doi.org/10.1016/j.egypro.2018.11.227	stainless steel Type 904	0.5M H2SO4	4	298	144	12.3608	0.199399	53.0992
55	https://doi.org/10.1016/j.egypro.2018.11.227	stainless steel Type 904	0.5M H2SO4	6	298	144	7.21689	0.116237	72.1074
55	https://doi.org/10.1016/j.egypro.2018.11.227	stainless steel Type 904	0.5M H2SO4	8	298	144	0.153549	0.000945003	99.5868
55	https://doi.org/10.1016/j.egypro.2018.11.227	stainless steel Type 904	0.5M H2SO4	10	298	144	0.153549	0.000945003	99.5868
55	https://doi.org/10.1016/j.egypro.2018.11.227	stainless steel Type 904	0.5M H2SO4	0	298	168	36.5451	0.516924	0
55	https://doi.org/10.1016/j.egypro.2018.11.227	stainless steel Type 904	0.5M H2SO4	2	298	168	23.4165	0.329811	35.7438
55	https://doi.org/10.1016/j.egypro.2018.11.227	stainless steel Type 904	0.5M H2SO4	4	298	168	17.6583	0.249484	51.2397
55	https://doi.org/10.1016/j.egypro.2018.11.227	stainless steel Type 904	0.5M H2SO4	6	298	168	10.1344	0.142698	72.1074
55	https://doi.org/10.1016/j.egypro.2018.11.227	stainless steel Type 904	0.5M H2SO4	8	298	168	0.307103	0.000945003	99.1736
55	https://doi.org/10.1016/j.egypro.2018.11.227	stainless steel Type 904	0.5M H2SO4	10	298	168	0.307103	0.000945003	99.5868
56	https://doi.org/10.1016/j.dt.2018.07.015	uns n08904 austenitic stainless steel Type 904L	3.5% NaCl	0	298	24	1.40237	0.15976	0
56	https://doi.org/10.1016/j.dt.2018.07.015	uns n08904 austenitic stainless steel Type 904L	3.5% NaCl	2	298	24	0.603549	0.0678679	57.0236
56	https://doi.org/10.1016/j.dt.2018.07.015	uns n08904 austenitic stainless steel Type 904L	3.5% NaCl	4	298	24	0.319526	0.0453454	71.0709
56	https://doi.org/10.1016/j.dt.2018.07.015	uns n08904 austenitic stainless steel Type 904L	3.5% NaCl	6	298	24	0	0	100
56	https://doi.org/10.1016/j.dt.2018.07.015	uns n08904 austenitic stainless steel Type 904L	3.5% NaCl	8	298	24	0.319526	0.0453454	71.21
56	https://doi.org/10.1016/j.dt.2018.07.015	uns n08904 austenitic stainless steel Type 904L	3.5% NaCl	10	298	24	0.319526	0.0342342	78.1641
56	https://doi.org/10.1016/j.dt.2018.07.015	uns n08904 austenitic stainless steel Type 904L	3.5% NaCl	0	298	48	2.80473	0.15976	0
56	https://doi.org/10.1016/j.dt.2018.07.015	uns n08904 austenitic stainless steel Type 904L	3.5% NaCl	2	298	48	0.550296	0.0741742	53.2684
56	https://doi.org/10.1016/j.dt.2018.07.015	uns n08904 austenitic stainless steel Type 904L	3.5% NaCl	4	298	48	0.905325	0.0513514	67.4548
56	https://doi.org/10.1016/j.dt.2018.07.015	uns n08904 austenitic stainless steel Type 904L	3.5% NaCl	6	298	48	0	0	100
56	https://doi.org/10.1016/j.dt.2018.07.015	uns n08904 austenitic stainless steel Type 904L	3.5% NaCl	8	298	48	0.905325	0.0513514	67.5939
56	https://doi.org/10.1016/j.dt.2018.07.015	uns n08904 austenitic stainless steel Type 904L	3.5% NaCl	10	298	48	0.710059	0.0396396	74.6871
56	https://doi.org/10.1016/j.dt.2018.07.015	uns n08904 austenitic stainless steel Type 904L	3.5% NaCl	0	298	72	3.81657	0.144144	0
56	https://doi.org/10.1016/j.dt.2018.07.015	uns n08904 austenitic stainless steel Type 904L	3.5% NaCl	2	298	72	2.00592	0.075976	47.0097
56	https://doi.org/10.1016/j.dt.2018.07.015	uns n08904 austenitic stainless steel Type 904L	3.5% NaCl	4	298	72	1.31361	0.0537538	62.726
56	https://doi.org/10.1016/j.dt.2018.07.015	uns n08904 austenitic stainless steel Type 904L	3.5% NaCl	6	298	72	0	0	100
56	https://doi.org/10.1016/j.dt.2018.07.015	uns n08904 austenitic stainless steel Type 904L	3.5% NaCl	8	298	72	1.40237	0.0501501	65.3686
56	https://doi.org/10.1016/j.dt.2018.07.015	uns n08904 austenitic stainless steel Type 904L	3.5% NaCl	10	298	72	1.40237	0.0501501	65.3686
56	https://doi.org/10.1016/j.dt.2018.07.015	uns n08904 austenitic stainless steel Type 904L	3.5% NaCl	0	298	96	5.11243	0.145045	0
56	https://doi.org/10.1016/j.dt.2018.07.015	uns n08904 austenitic stainless steel Type 904L	3.5% NaCl	2	298	96	2.82248	0.0798799	44.9235
56	https://doi.org/10.1016/j.dt.2018.07.015	uns n08904 austenitic stainless steel Type 904L	3.5% NaCl	4	298	96	1.93491	0.0540541	62.3088
56	https://doi.org/10.1016/j.dt.2018.07.015	uns n08904 austenitic stainless steel Type 904L	3.5% NaCl	6	298	96	0	0	100
56	https://doi.org/10.1016/j.dt.2018.07.015	uns n08904 austenitic stainless steel Type 904L	3.5% NaCl	8	298	96	1.7574	0.0510511	64.395
56	https://doi.org/10.1016/j.dt.2018.07.015	uns n08904 austenitic stainless steel Type 904L	3.5% NaCl	10	298	96	1.7574	0.0510511	64.395
56	https://doi.org/10.1016/j.dt.2018.07.015	uns n08904 austenitic stainless steel Type 904L	3.5% NaCl	0	298	120	8.71598	0.197898	0
56	https://doi.org/10.1016/j.dt.2018.07.015	uns n08904 austenitic stainless steel Type 904L	3.5% NaCl	2	298	120	4.81065	0.109309	44.6453
56	https://doi.org/10.1016/j.dt.2018.07.015	uns n08904 austenitic stainless steel Type 904L	3.5% NaCl	4	298	120	3.42604	0.0777778	60.3616
56	https://doi.org/10.1016/j.dt.2018.07.015	uns n08904 austenitic stainless steel Type 904L	3.5% NaCl	6	298	120	0	0	100
56	https://doi.org/10.1016/j.dt.2018.07.015	uns n08904 austenitic stainless steel Type 904L	3.5% NaCl	8	298	120	3.10651	0.0702703	63.9777
56	https://doi.org/10.1016/j.dt.2018.07.015	uns n08904 austenitic stainless steel Type 904L	3.5% NaCl	10	298	120	3.10651	0.0702703	63.6996
56	https://doi.org/10.1016/j.dt.2018.07.015	uns n08904 austenitic stainless steel Type 904L	3.5% NaCl	0	298	144	9.33728	0.176276	0
56	https://doi.org/10.1016/j.dt.2018.07.015	uns n08904 austenitic stainless steel Type 904L	3.5% NaCl	2	298	144	5.20118	0.0984985	43.9499
56	https://doi.org/10.1016/j.dt.2018.07.015	uns n08904 austenitic stainless steel Type 904L	3.5% NaCl	4	298	144	3.76331	0.0696696	59.8053
56	https://doi.org/10.1016/j.dt.2018.07.015	uns n08904 austenitic stainless steel Type 904L	3.5% NaCl	6	298	144	0.585798	0.0111111	93.185
56	https://doi.org/10.1016/j.dt.2018.07.015	uns n08904 austenitic stainless steel Type 904L	3.5% NaCl	8	298	144	3.69231	0.0696696	59.6662
56	https://doi.org/10.1016/j.dt.2018.07.015	uns n08904 austenitic stainless steel Type 904L	3.5% NaCl	10	298	144	3.69231	0.0714715	59.8053
56	https://doi.org/10.1016/j.dt.2018.07.015	uns n08904 austenitic stainless steel Type 904L	3.5% NaCl	0	298	168	10.6509	0.172372	0
56	https://doi.org/10.1016/j.dt.2018.07.015	uns n08904 austenitic stainless steel Type 904L	3.5% NaCl	2	298	168	6.0355	0.0975976	43.1154
56	https://doi.org/10.1016/j.dt.2018.07.015	uns n08904 austenitic stainless steel Type 904L	3.5% NaCl	4	298	168	4.31361	0.06997	58.9708
56	https://doi.org/10.1016/j.dt.2018.07.015	uns n08904 austenitic stainless steel Type 904L	3.5% NaCl	6	298	168	0.798817	0.0126126	92.2114
56	https://doi.org/10.1016/j.dt.2018.07.015	uns n08904 austenitic stainless steel Type 904L	3.5% NaCl	8	298	168	4.31361	0.0708709	59.1099
56	https://doi.org/10.1016/j.dt.2018.07.015	uns n08904 austenitic stainless steel Type 904L	3.5% NaCl	10	298	168	4.31361	0.0708709	59.1099
57	https://doi.org/10.1007/s40735-019-0239-3	stainless steel Type 316	3.5% NaCl	2	298	24	0.3	0.091022	97.22
57	https://doi.org/10.1007/s40735-019-0239-3	stainless steel Type 316	3.5% NaCl	6	288	24	0.0001	7.59e-06	99.99
57	https://doi.org/10.1007/s40735-019-0239-3	stainless steel Type 316	3.5% NaCl	6	308	24	0.0001	7.59e-06	99.99
57	https://doi.org/10.1007/s40735-019-0239-3	stainless steel Type 316	3.5% NaCl	10	298	24	0.0001	7.59e-06	99.99
57	https://doi.org/10.1007/s40735-019-0239-3	stainless steel Type 316	3.5% NaCl	2	288	96	0.1	0.018888	99
57	https://doi.org/10.1007/s40735-019-0239-3	stainless steel Type 316	3.5% NaCl	2	308	96	3.8	0.157897	89
57	https://doi.org/10.1007/s40735-019-0239-3	stainless steel Type 316	3.5% NaCl	6	298	96	0.0001	7.59e-06	99.99
57	https://doi.org/10.1007/s40735-019-0239-3	stainless steel Type 316	3.5% NaCl	6	298	96	0.0001	7.59e-06	99.99
57	https://doi.org/10.1007/s40735-019-0239-3	stainless steel Type 316	3.5% NaCl	6	298	96	0.0001	7.59e-06	99.99
57	https://doi.org/10.1007/s40735-019-0239-3	stainless steel Type 316	3.5% NaCl	6	298	96	0.0001	7.59e-06	99.99
57	https://doi.org/10.1007/s40735-019-0239-3	stainless steel Type 316	3.5% NaCl	6	298	96	0.0001	7.59e-06	99.99
57	https://doi.org/10.1007/s40735-019-0239-3	stainless steel Type 316	3.5% NaCl	10	288	96	0.0001	7.59e-06	99.99
57	https://doi.org/10.1007/s40735-019-0239-3	stainless steel Type 316	3.5% NaCl	10	308	96	0.0001	7.59e-06	99.99
57	https://doi.org/10.1007/s40735-019-0239-3	stainless steel Type 316	3.5% NaCl	2	298	168	5.7	0.247061	85.11
57	https://doi.org/10.1007/s40735-019-0239-3	stainless steel Type 316	3.5% NaCl	6	288	168	0.0001	7.59e-06	99.99
57	https://doi.org/10.1007/s40735-019-0239-3	stainless steel Type 316	3.5% NaCl	6	308	168	0.2	0.084789	98
57	https://doi.org/10.1007/s40735-019-0239-3	stainless steel Type 316	3.5% NaCl	10	298	168	0.0001	7.59e-06	99.99
